# Supplementary material for: Temporal Requirements of cMyc Protein for Reprogramming Mouse Fibroblasts
Source: Hindawi journal article supplement (doi:10.1155/2012/541014), 2012-01-01
Supplement: f1 [file 541014.f1.pdf]

## Supplemental Figure 1A

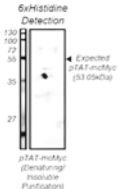

## Supplemental Figure 1B

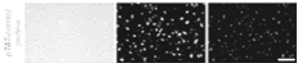

## Supplemental Figure 1C

| CLONING                                 | Fwd (5'-3')                  | Rev (5'-3')                    |
|-----------------------------------------|------------------------------|--------------------------------|
| TAT-mctAyc laser<br>(our sites in bold) | ATCGATCGAT <b>CGAATTC</b> CC | TAAGCTAGCTACT <b>CGAGTC</b> AT |
|                                         | CCTCACCGCTACTTC              | TACTATGCACCAGAGTTTC            |
|                                         |                              | AAO                            |
